# Supplementary material for: Temperature and light regulated patterns of physiology, morphology and elemental stoichiometry in geographically distinct isolates of a cosmopolitan diatom
Source: Copernicus journal article supplement (doi:10.5194/egusphere-2026-45), 2026-01-16
Supplement: Supplementary file 1 [file egusphere-2026-45-supplement.pdf]

## Supplementary data:

# Temperature and light regulated patterns of physiology, morphology and elemental stoichiometry in geographically distinct isolates of a 5 cosmopolitan diatom

Alyson M. Theseira<sup>1</sup>, Daniel A. Nielsen<sup>1</sup>, Penelope Ajani<sup>1</sup>, Katherina Petrou<sup>1</sup>

<sup>1</sup>School of Life Sciences, University of Technology Sydney, 15 Broadway, Ultimo, NSW 2007, Australia

Correspondence to: Katherina Petrou ([Katherina.Petrou@uts.edu.au](mailto:Katherina.Petrou@uts.edu.au))

25 **Supplementary Tables:**

**Supplementary Table S1.** Macronutrient concentrations. Initial (T0) and final (T24) concentrations of macronutrients: nitrate/nitrate (NO<sub>x</sub>) and phosphate, following 24 h PDMPO incubation of *Leptocylindrus danicus* strains in response to temperature at each light treatment. Data represent the mean of four biological replicates ± SD.

| Light<br>( $\mu\text{mol photons m}^{-2} \text{ s}^{-1}$ ) | Temp<br>(°C) | Strain<br>isolation<br>location | T0                                            |                                         | T24                                           |                                         |
|------------------------------------------------------------|--------------|---------------------------------|-----------------------------------------------|-----------------------------------------|-----------------------------------------------|-----------------------------------------|
|                                                            |              |                                 | NO <sub>x</sub><br>( $\mu\text{mol L}^{-1}$ ) | Phosphate<br>( $\mu\text{mol L}^{-1}$ ) | NO <sub>x</sub><br>( $\mu\text{mol L}^{-1}$ ) | Phosphate<br>( $\mu\text{mol L}^{-1}$ ) |
| 100                                                        | 22           | Coffs Harbour                   | 153.17 ± 9.68                                 | 3.212 ± 0.659                           | 108.86 ± 6.58                                 | 0.397 ± 0.263                           |
|                                                            | 20           | Forster                         | 168.92 ± 3.97                                 | 4.674 ± 0.241                           | 124.63 ± 6.26                                 | 1.503 ± 0.520                           |
|                                                            | 18           | Maroubra                        | 175.78 ± 4.93                                 | 4.665 ± 0.259                           | 156.65 ± 2.26                                 | 3.010 ± 0.120                           |
|                                                            | 16           | Twofold Bay                     | n.d.                                          | n.d.                                    | n.d.                                          | n.d.                                    |
| 55                                                         | 22           | Coffs Harbour                   | 151.57 ± 1.22                                 | 4.539 ± 0.160                           | 136.82 ± 5.53                                 | 2.998 ± 0.248                           |
|                                                            | 20           | Forster                         | 148.50 ± 1.65                                 | 5.207 ± 0.183                           | 130.20 ± 6.36                                 | 3.376 ± 0.346                           |
|                                                            | 18           | Maroubra                        | 155.23 ± 2.73                                 | 5.732 ± 0.058                           | 147.33 ± 1.35                                 | 4.124 ± 0.417                           |
|                                                            | 16           | Twofold Bay                     | 161.28 ± 1.34                                 | 6.094 ± 0.037                           | 161.08 ± 3.97                                 | 5.605 ± 0.314                           |

Supplementary Figures:

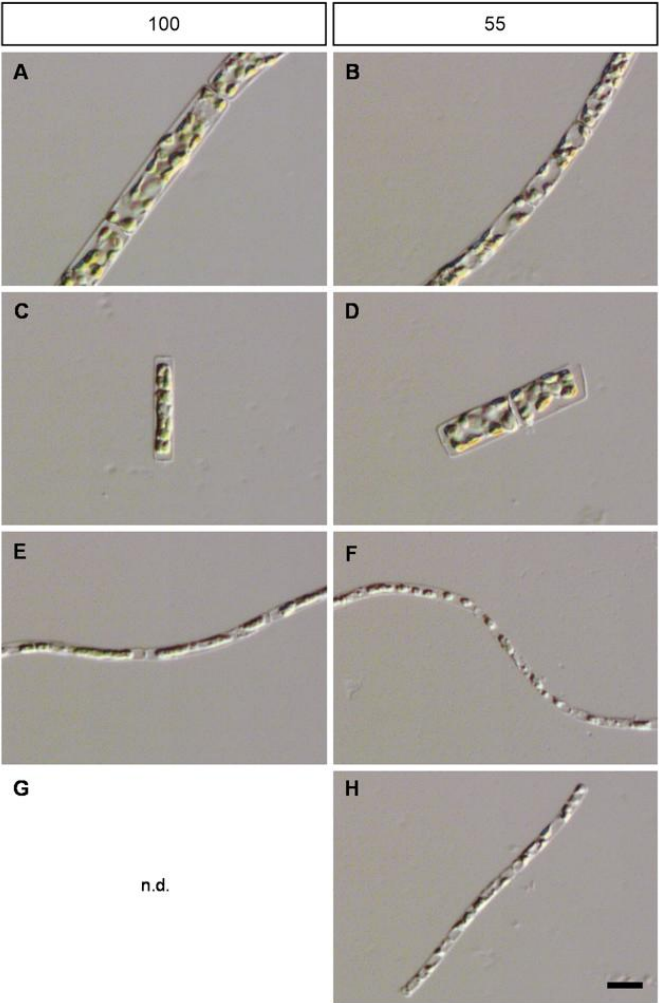

35 **Supplementary Figure S1 | Strain morphology.** Micrographs of *Leptocylindrus danicus* strains used in the current study. The left column row shows strains grown under 100  $\mu\text{mol photons m}^{-2} \text{s}^{-1}$ , and right column shows strains grown under 55  $\mu\text{mol photons m}^{-2} \text{s}^{-1}$  (A, B Coffs Harbour, C, D Forster, E, F Maroubra and G, H Twofold Bay strains). Black scale bar represents 10  $\mu\text{m}$ .
